# Supplementary material for: Growth Behavior of Selected Ustilaginaceae Fungi Used for Mannosylerythritol Lipid (MEL) Biosurfactant Production – Evaluation of a Defined Culture Medium
Source: PubMed Central journal article supplement (PMC7609910; doi:10.3389/fbioe.2020.555280), 2020-10-21
Supplement: Data_Sheet_1.pdf [file Data_Sheet_1.pdf]

## Supplementary Material

### 1 Supplementary Figures

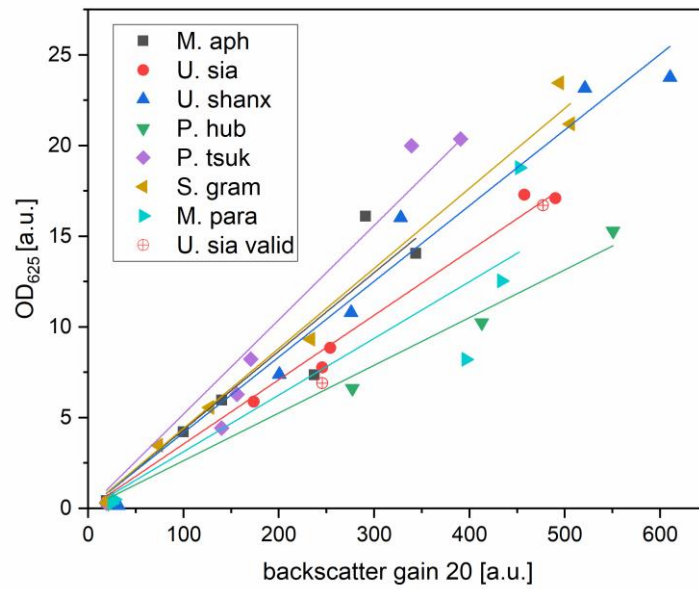

**Supplementary Figure 1** Correlation of backscatter (gain 20) data from the micro-fermentation system with respective OD<sub>625</sub> values from parallel shake flask cultivations for selected species in medium 2. Positive correlation of data proves the transferability of results obtained with the two methods.

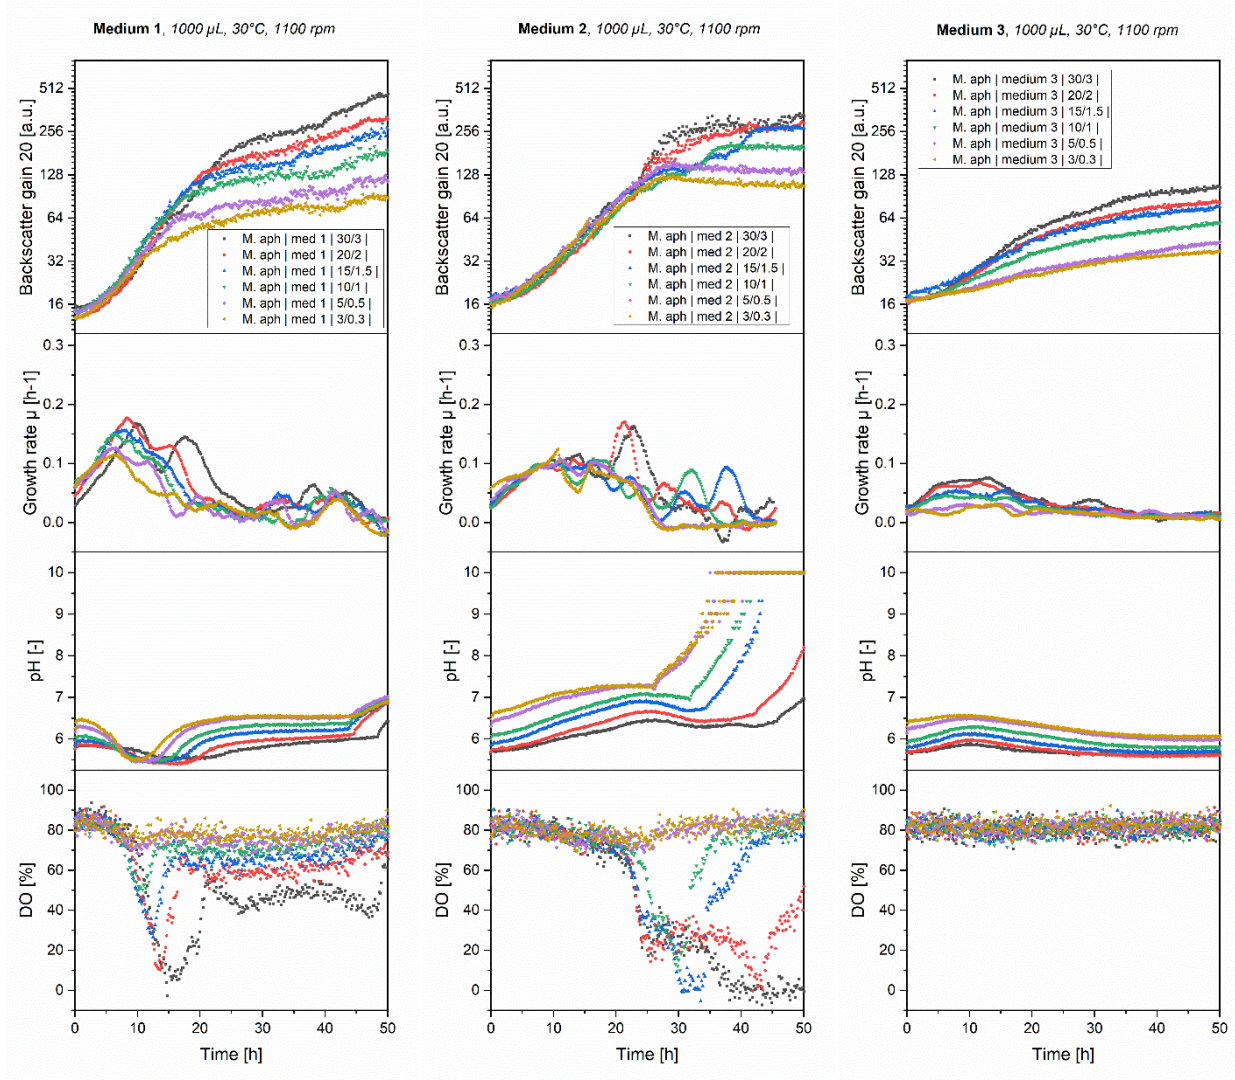

**Supplementary Figure 2** Online growth profiles (backscatter, growth rates, pH and DO) for *M. aphidis* in medium 1 (left), medium 2 (middle) and medium 3 (right) with varying medium concentrations from 3 to 30 g L<sup>-1</sup> glucose. Higher substrate concentrations led to higher final backscatter, slightly increasing growth rates and lower dissolved oxygen levels, i.e. higher oxygen demand.

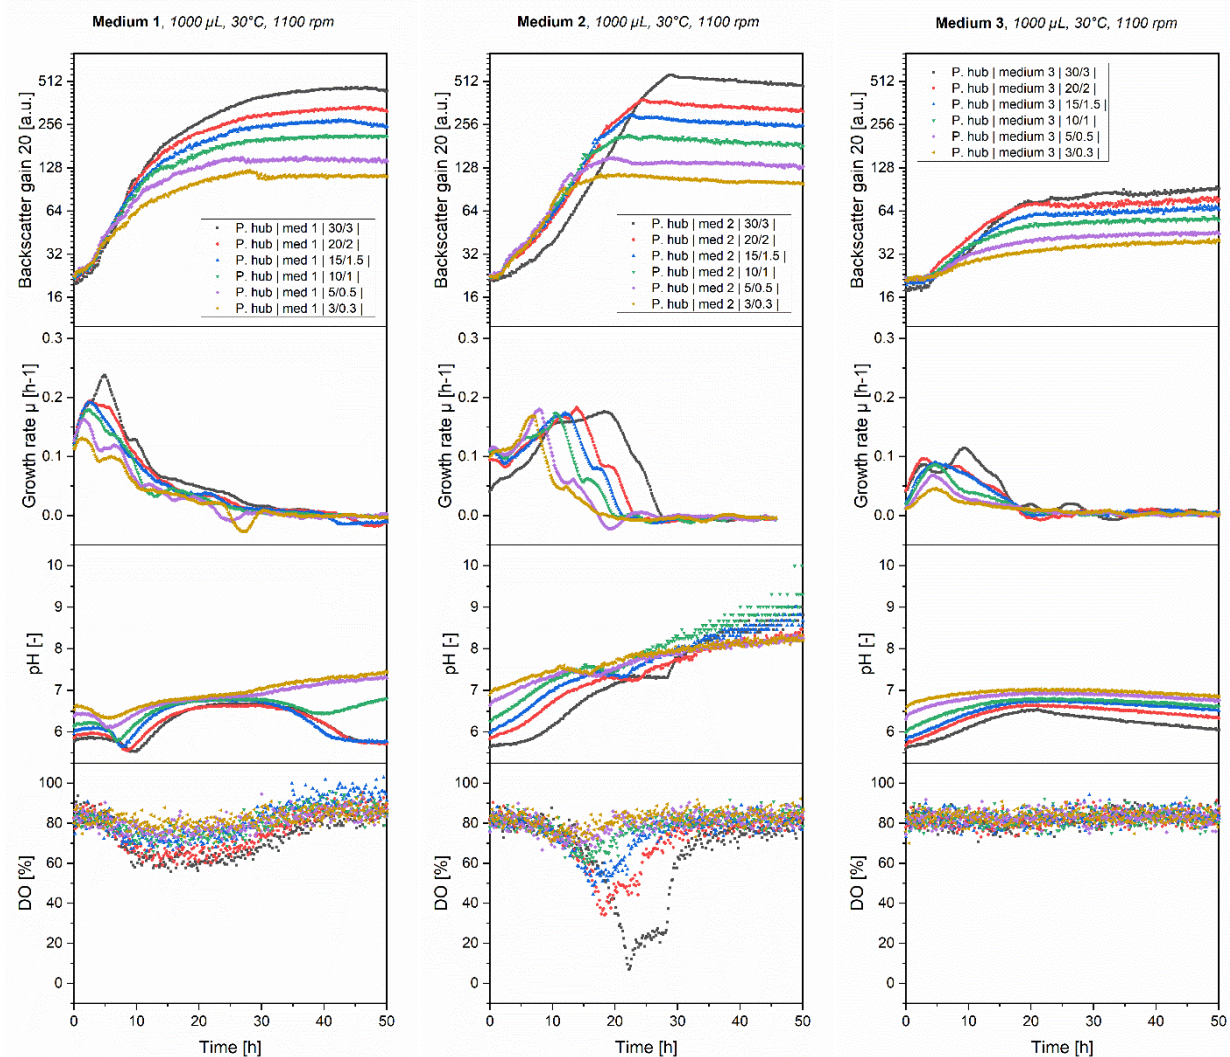

**Supplementary Figure 3** Online growth profiles (backscatter, growth rates, pH and DO) for *P. hubeiensis* in medium 1 (left), medium 2 (middle) and medium 3 (right) with varying medium concentrations from 3 to 30 g L<sup>-1</sup> glucose. Higher substrate concentrations led to higher final backscatter, slightly increasing growth rates and lower dissolved oxygen levels, i.e. higher oxygen demand.



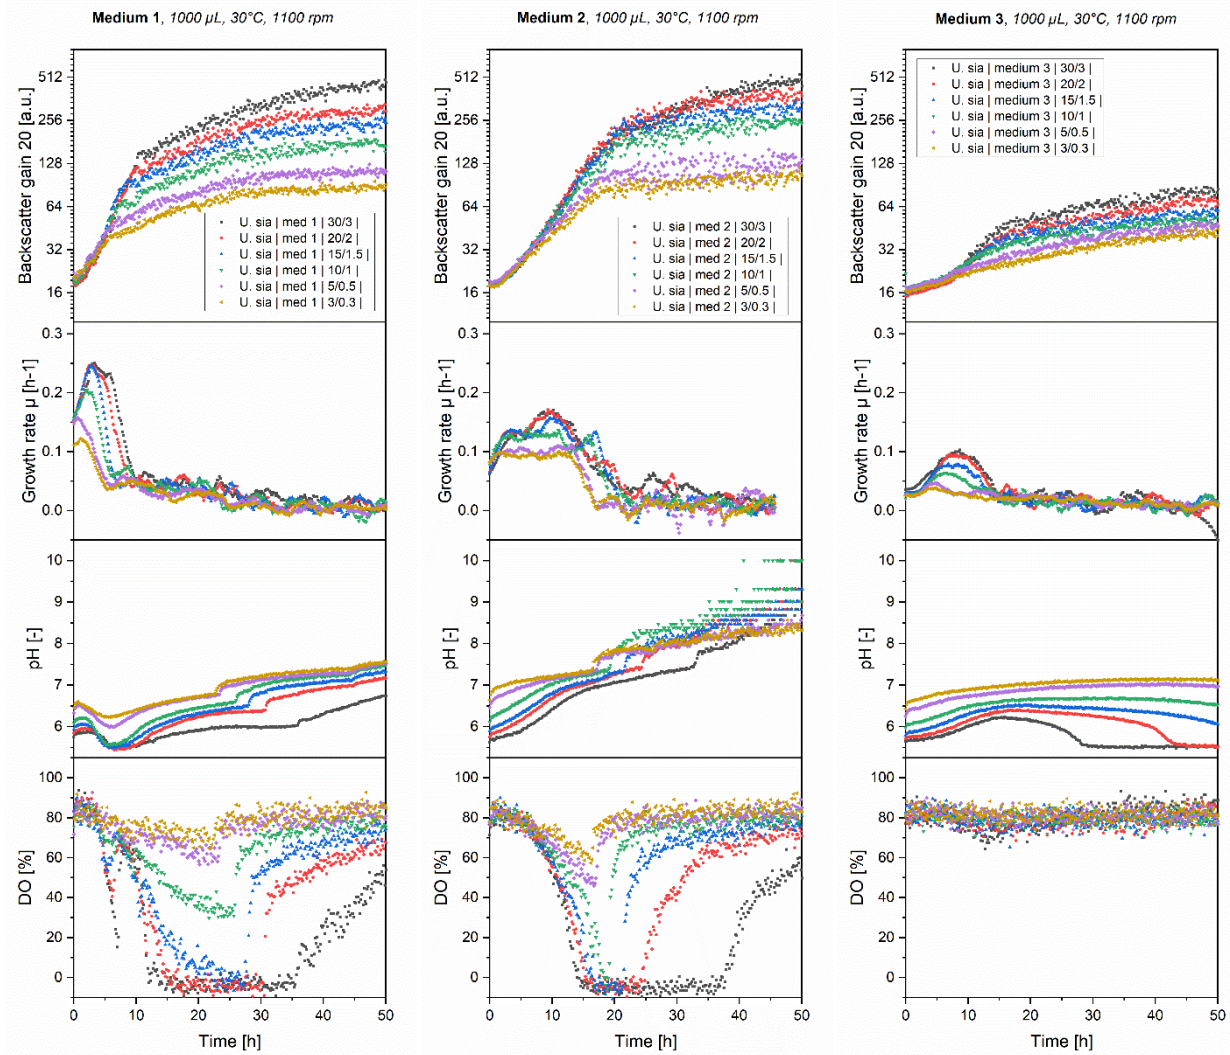

**Supplementary Figure 4** Online growth profiles (backscatter, growth rates, pH and DO) for *U. siamensis* in medium 1 (left), medium 2 (middle) and medium 3 (right) with varying medium concentrations from 3 to 30  $\text{g L}^{-1}$  glucose. Higher substrate concentrations led to higher final backscatter, slightly increasing growth rates and lower dissolved oxygen levels, i.e. higher oxygen demand.

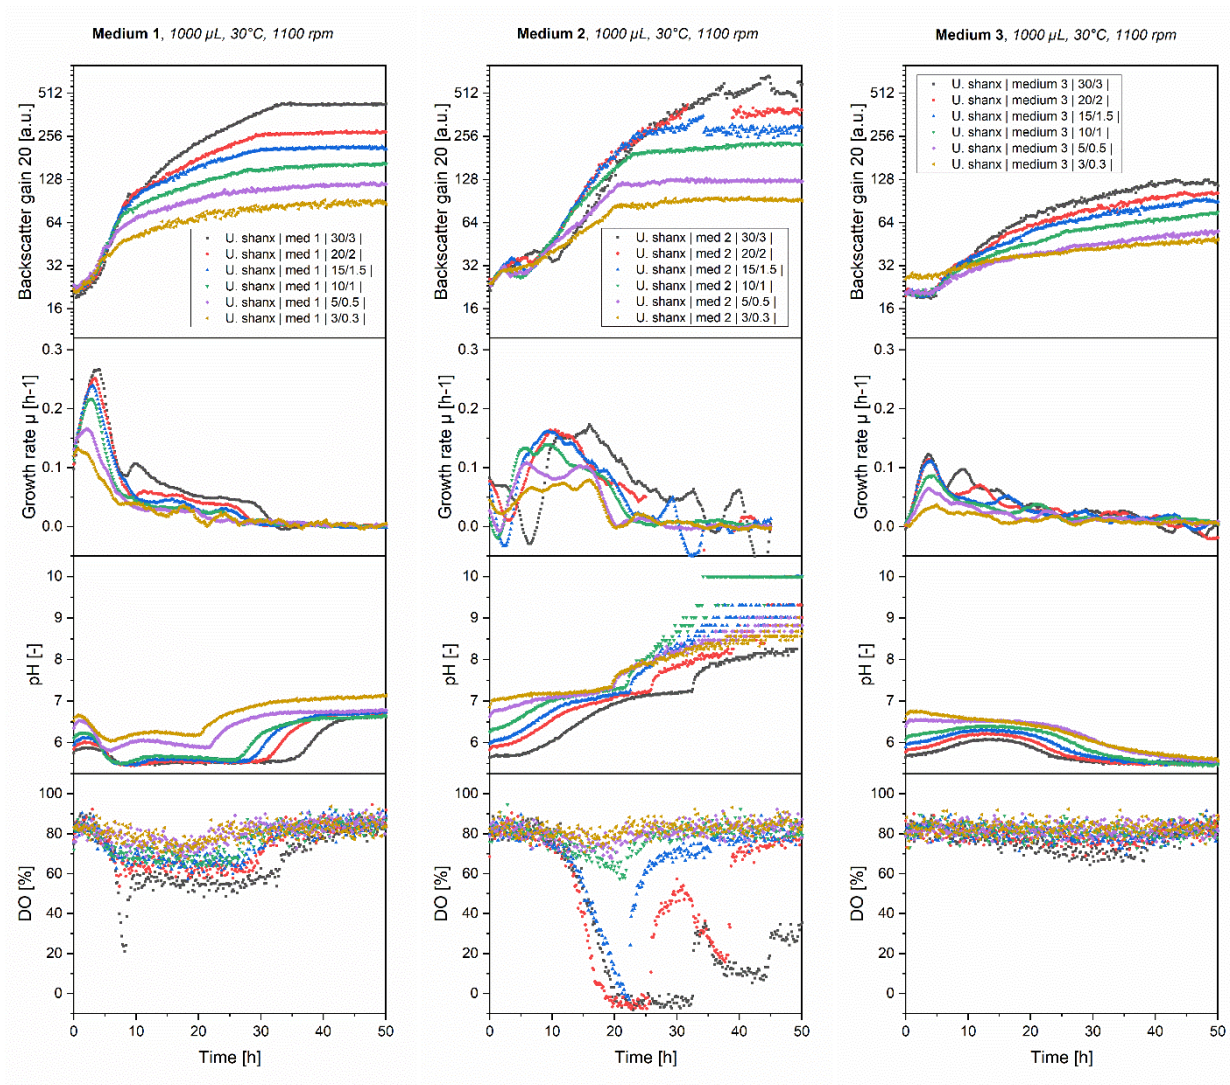

**Supplementary Figure 5** Online growth profiles (backscatter, growth rates, pH and DO) for *U. shanxiensis* in medium 1 (left), medium 2 (middle) and medium 3 (right) with varying medium concentrations from 3 to 30 g L<sup>-1</sup> glucose. Higher substrate concentrations led to higher final backscatter, slightly increasing growth rates and lower dissolved oxygen levels, i.e. higher oxygen demand.



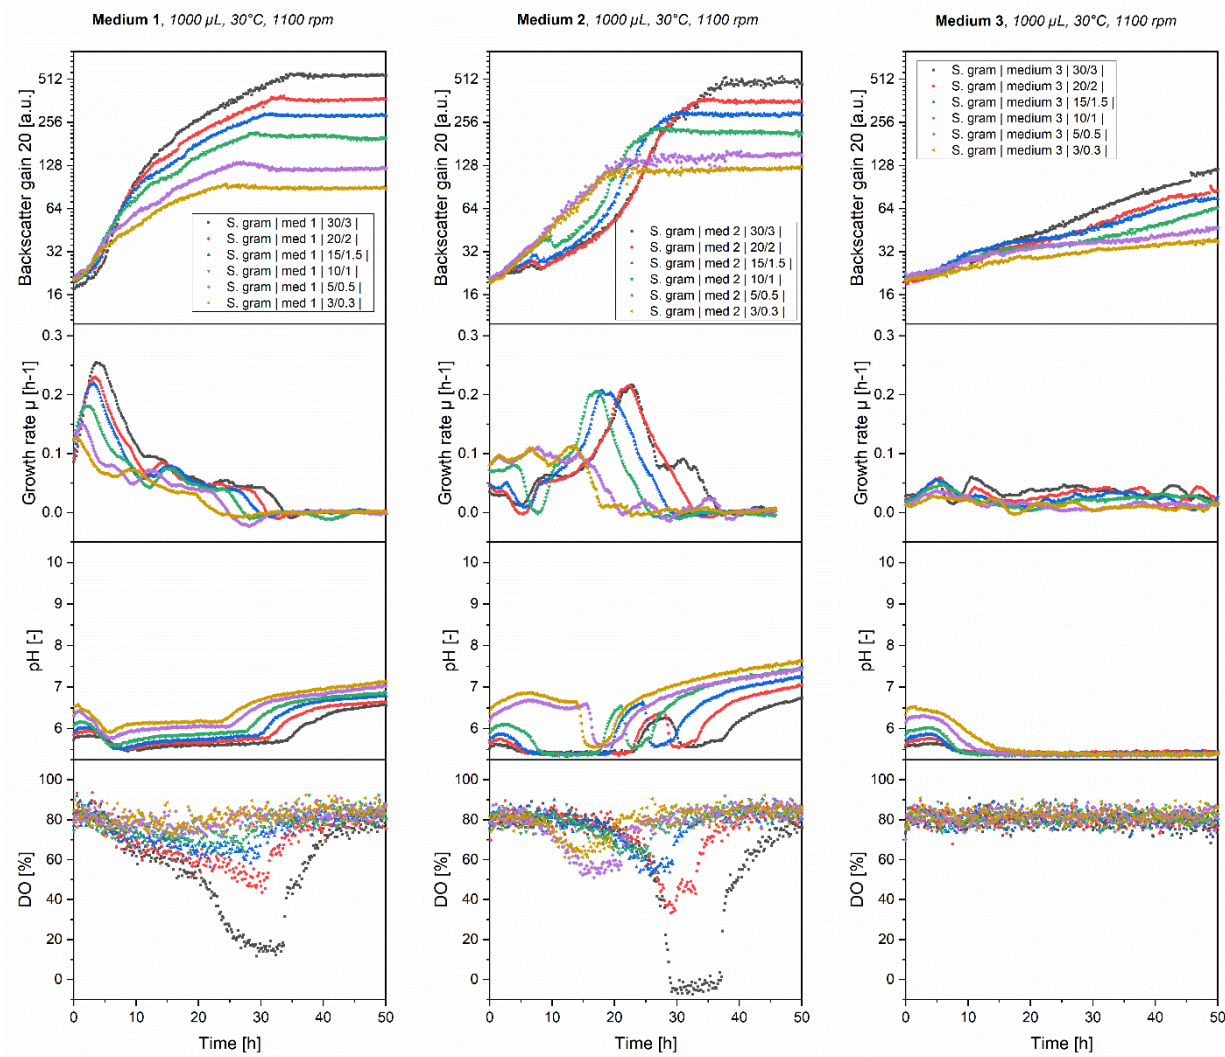

**Supplementary Figure 6** Online growth profiles (backscatter, growth rates, pH and DO) for *S. graminicola* in medium 1 (left), medium 2 (middle) and medium 3 (right) with varying medium concentrations from 3 to 30 g L<sup>-1</sup> glucose. Higher substrate concentrations led to higher final backscatter, slightly increasing growth rates and lower dissolved oxygen levels, i.e. higher oxygen demand.

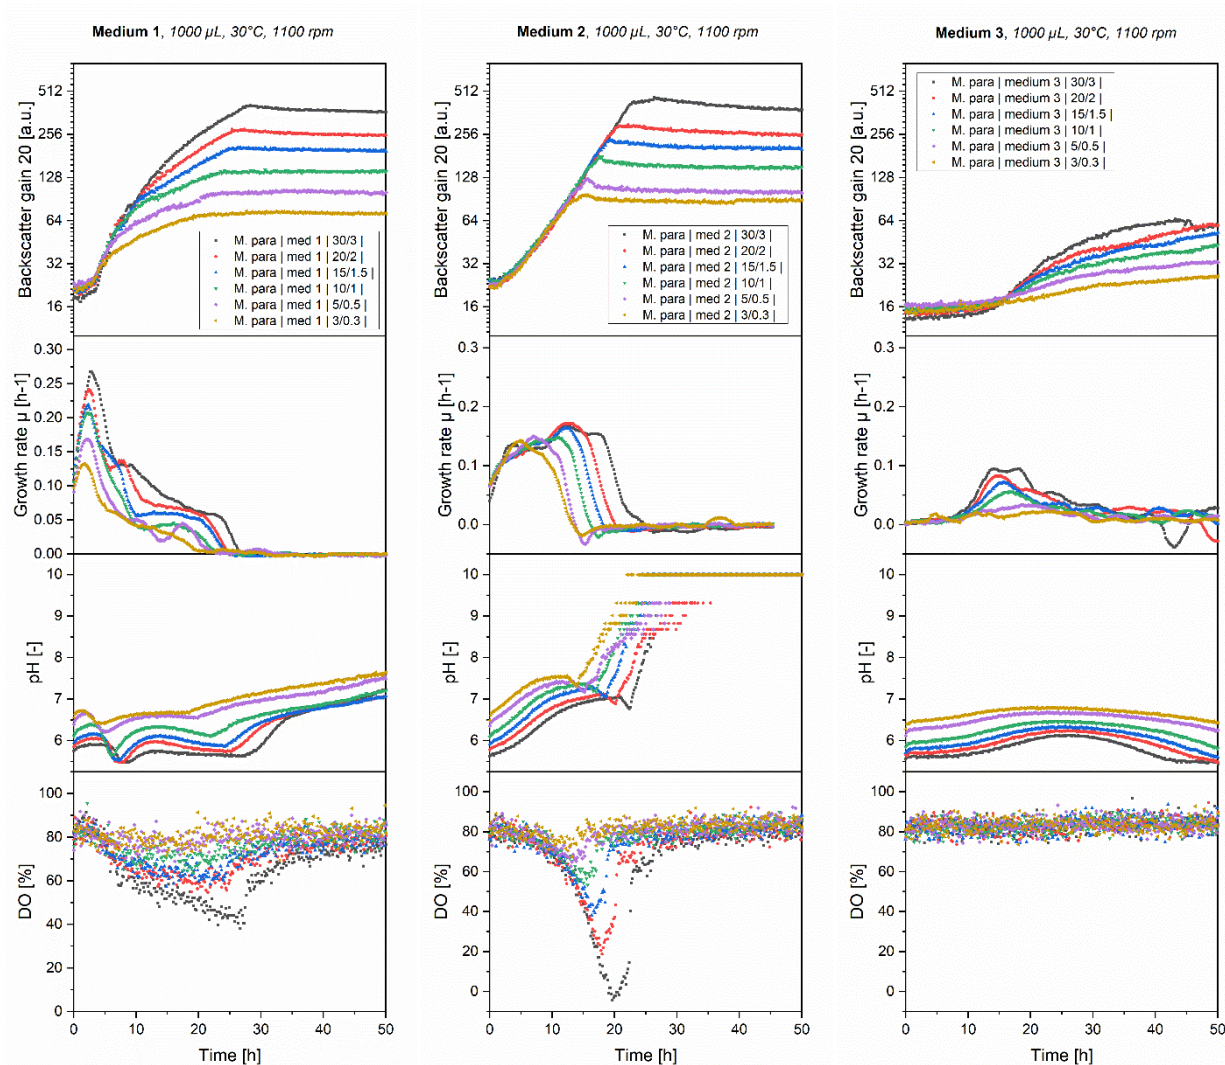

**Supplementary Figure 7** Online growth profiles (backscatter, growth rates, pH and DO) for *M. parantarcticus* in medium 1 (left), medium 2 (middle) and medium 3 (right) with varying medium concentrations from 3 to 30 g L<sup>-1</sup> glucose. Higher substrate concentrations led to higher final backscatter, slightly increasing growth rates and lower dissolved oxygen levels, i.e. higher oxygen demand.



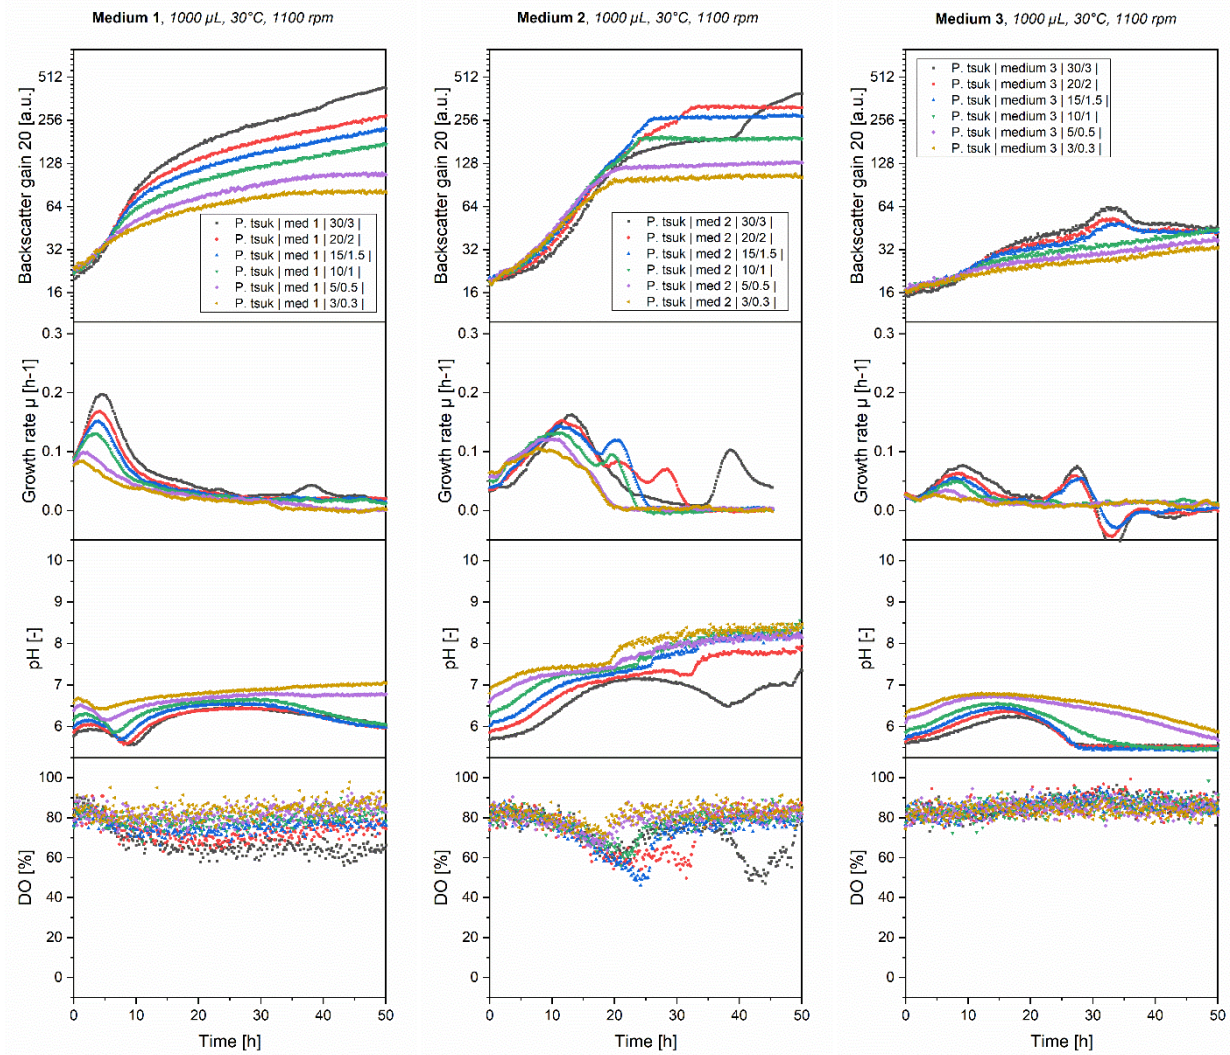

**Supplementary Figure 8** Online growth profiles (backscatter, growth rates, pH and DO) for *P. tsukubaensis* in medium 1 (left), medium 2 (middle) and medium 3 (right) with varying medium concentrations from 3 to 30 g L<sup>-1</sup> glucose. Higher substrate concentrations led to higher final backscatter, slightly increasing growth rates and lower dissolved oxygen levels, i.e. higher oxygen demand.



*U. shanxiensis*, 30 °C, 1100 rpm

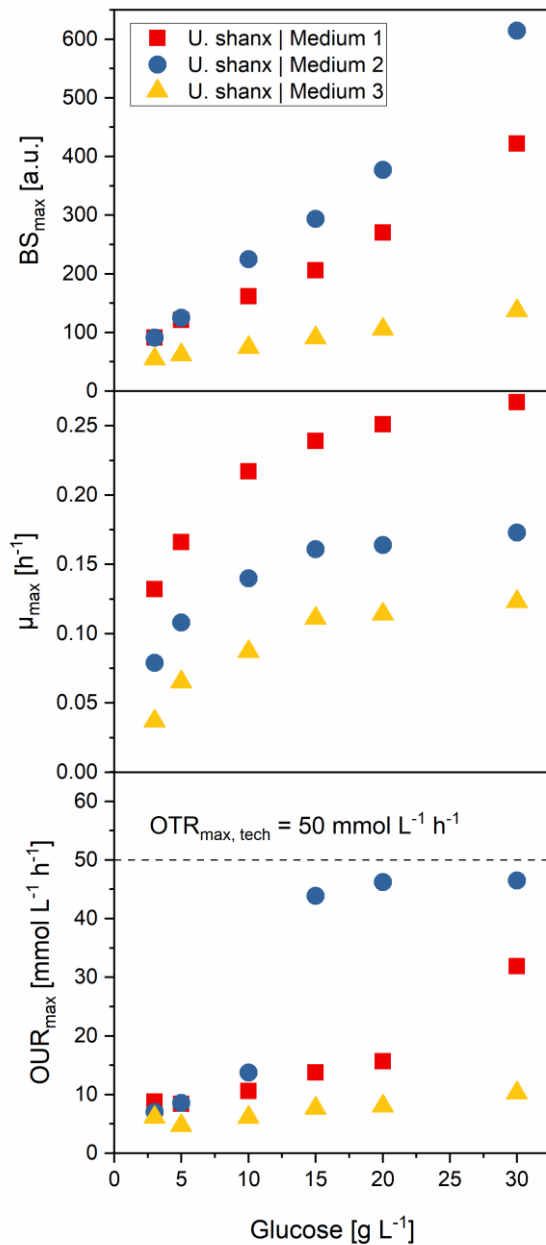

*S. graminicola*, 30 °C, 1100 rpm

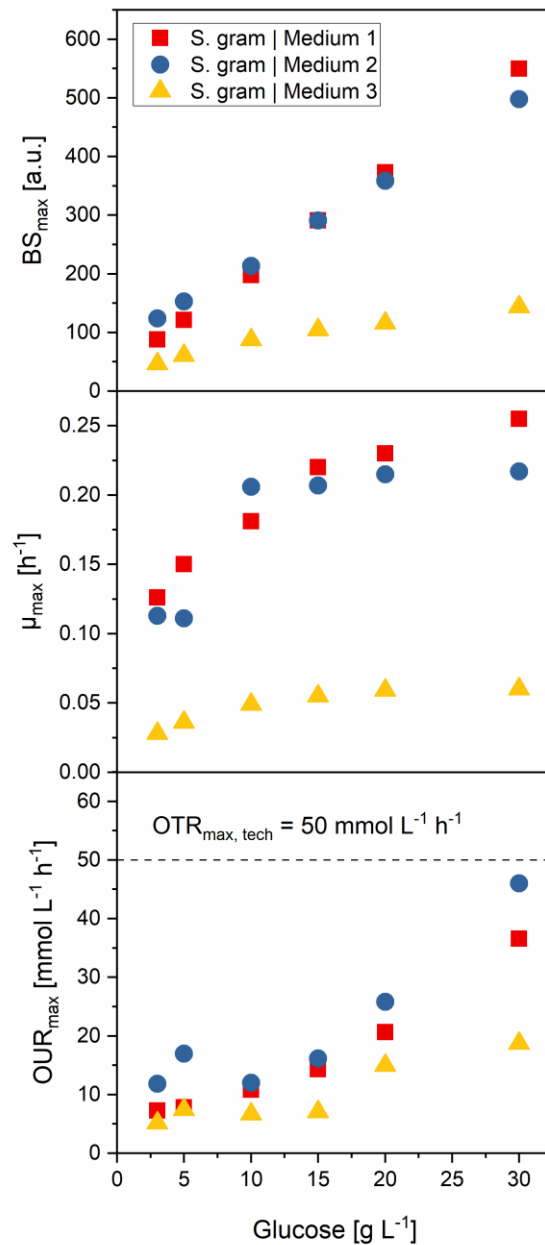

**Supplementary Figure 9** Comparison of max. final backscatter  $BS_{max}$ , max. specific growth rate  $\mu_{max}$  and max. oxygen uptake rates  $OUR_{max}$  for *U. shanxiensis* (left) and *S. graminicola* (right) in the three media with increasing medium concentrations from 3 to 30 g L<sup>-1</sup> glucose equivalent.  $BS_{max}$  values were comparable between medium 1 and 2, and increased proportionally with medium concentration. Maximum growth rates  $\mu_{max}$  increased until the point of oxygen limitation. Oxygen limitation occurred when the  $OUR_{max}$  values were equal to the  $OTR_{max}$ . The respective medium concentration that led to oxygen limitation was different for each species and medium.

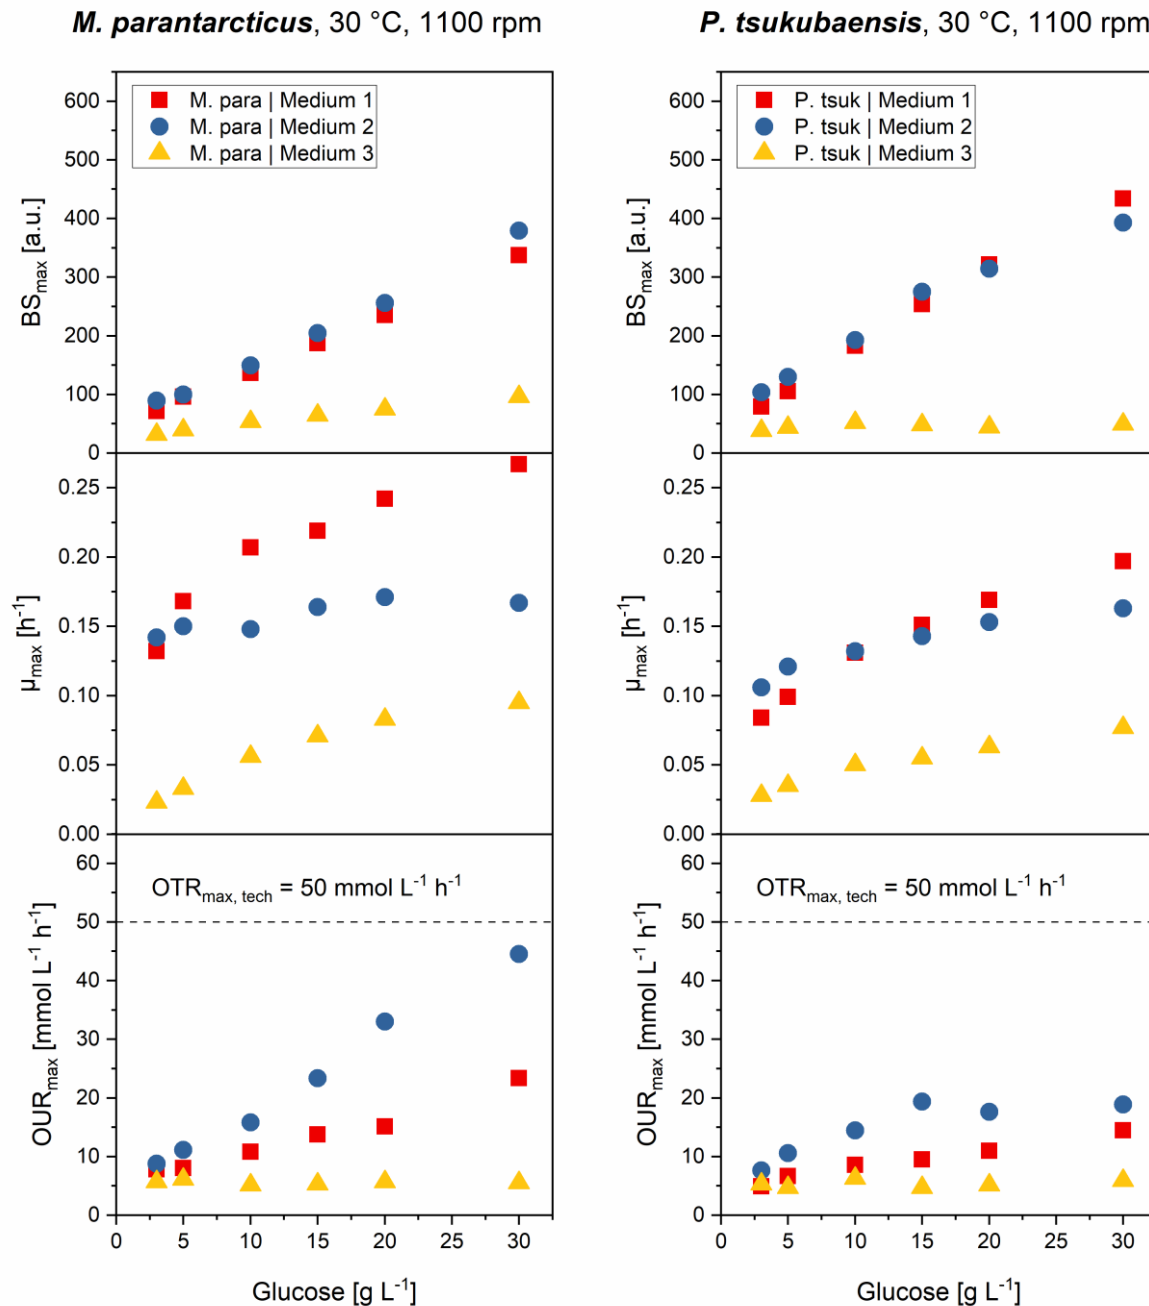

**Supplementary Figure 10** Comparison of max. final backscatter  $BS_{\max}$ , max. specific growth rate  $\mu_{\max}$  and max. oxygen uptake rates  $OUR_{\max}$  for *M. parantarcticus* (left) and *P. tsukubanesis* (right) in the three media with increasing medium concentrations from 3 to 30 g L<sup>-1</sup> glucose equivalent.  $BS_{\max}$  values were comparable between medium 1 and 2, and increased proportionally with medium concentration. Maximum growth rates  $\mu_{\max}$  increased until the point of oxygen limitation. Oxygen limitation occurred when the  $OUR_{\max}$  values were equal to the  $OTR_{\max}$ . The respective medium concentration that led to oxygen limitation was different for each species and medium.



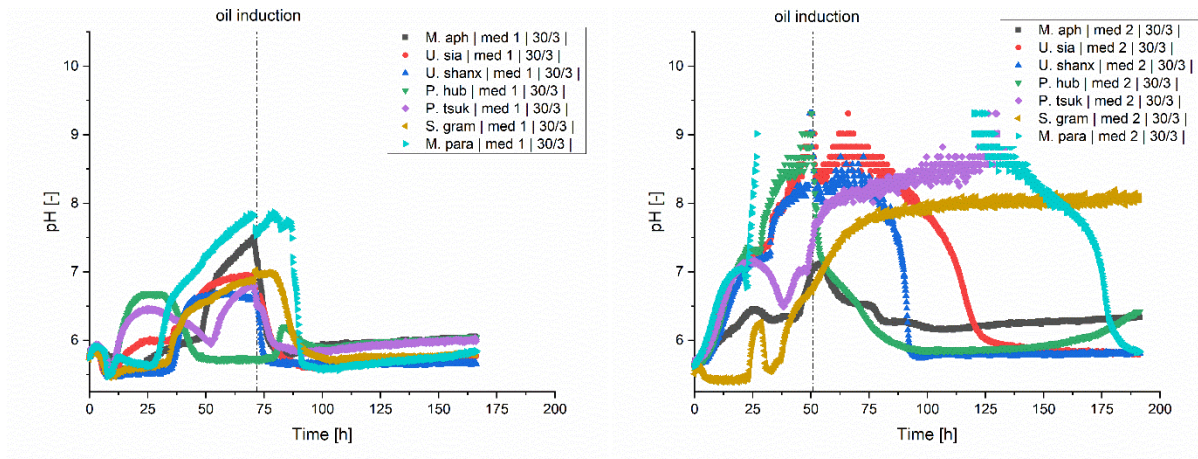

**Supplementary Figure 11** Online pH values during growth and production phase (after oil addition) for all seven *Ustilaginaceae* species in medium 1 (left) and medium 2 (right) with an initial concentration of 30 g L<sup>-1</sup> glucose. Growth phase lasted for 72 h in medium 1 and 48 h in medium 2, before oil was added.

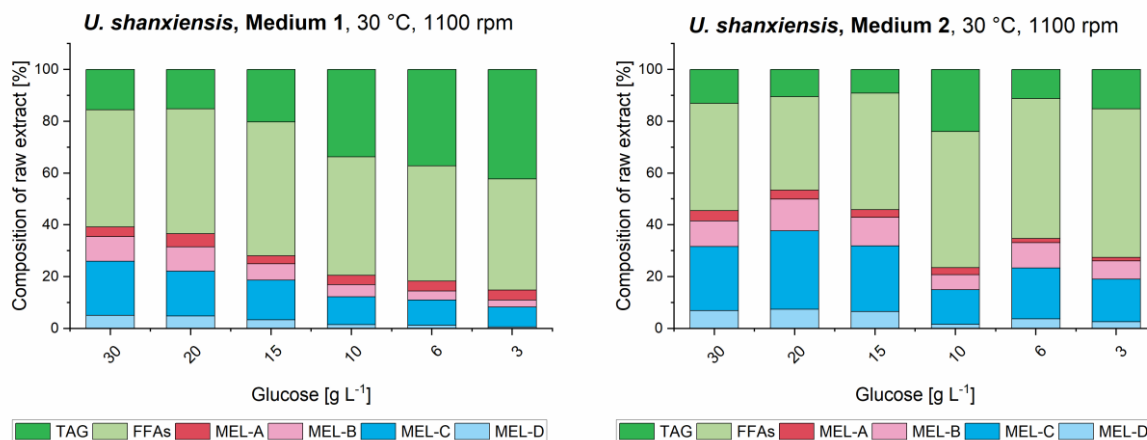

**Supplementary Figure 12** Composition of the organic extracts from *U. shanxiensis* cultures with increasing initial concentrations in medium 1 (left) and medium 2 (right), taken from the microtiter plates after MEL production was induced with 8 % v/v rapeseed oil. Relative amounts of unconsumed triglycerides (TAG), free fatty acids (FFAs) and the different MEL variants are shown.

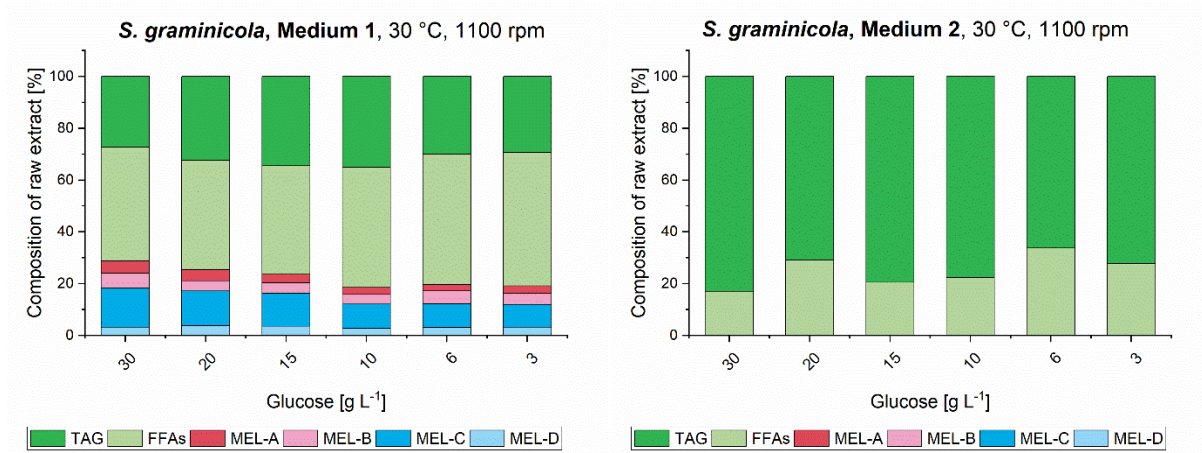

**Supplementary Figure 13** Composition of the organic extracts from *S. graminicola* cultures with increasing initial concentrations in medium 1 (left) and medium 2 (right), taken from the microtiter plates after MEL production was induced with 8 % v/v rapeseed oil. Relative amounts of unconsumed triglycerides (TAG), free fatty acids (FFAs) and the different MEL variants are shown.

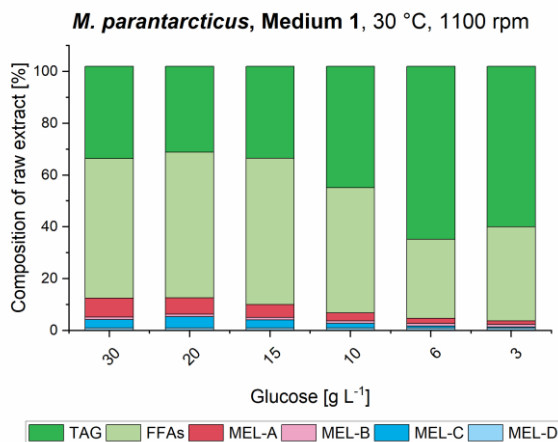

**Supplementary Figure 14** Composition of the organic extracts from *M. parantarcticus* cultures with increasing initial concentrations in medium 1, taken from the microtiter plates after MEL production was induced with 8 % v/v rapeseed oil. Relative amounts of unconsumed triglycerides (TAG), free fatty acids (FFAs) and the different MEL variants are shown.



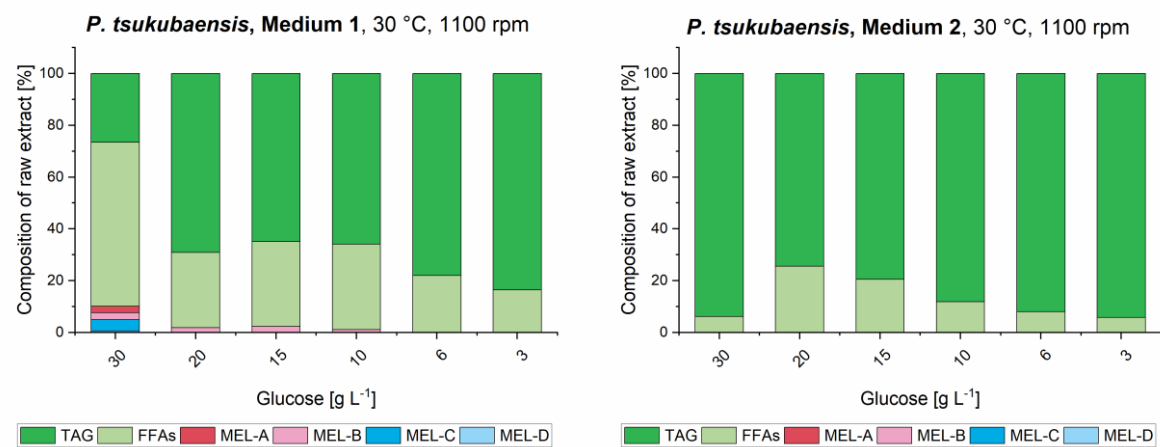

**Supplementary Figure 15** Composition of the organic extracts from *P. tsukubaensis* cultures with increasing initial concentrations in medium 1 (left) and medium 2 (right), taken from the microtiter plates after MEL production was induced with 8 % v/v rapeseed oil. Relative amounts of unconsumed triglycerides (TAG), free fatty acids (FFAs) and the different MEL variants are shown.
